# Supplementary material for: Acute Cellular Rejection Elicits Distinct MicroRNA Signatures in Airway Epithelium of Lung Transplant Patients
Source: PubMed Central journal article supplement — Transplant Direct. 2015 Nov 20;1(10):e44. doi: 10.1097/TXD.0000000000000551 (PMC4914138; doi:10.1097/txd.0000000000000551), 2015-11-20
Supplement: NIHMS729675-supplement-01.pdf [file NIHMS729675-supplement-01.pdf]

**Table S1.** List of 117 differentially expressed microRNAs in airway epithelial cells of lung transplantation patients with acute cellular rejection (Q-value < 0.05).

| <b>microRNA</b>  | <b>Q-value</b> |
|------------------|----------------|
| hsa-miR-1205     | 0.0000         |
| hsa-miR-125a-3p  | 0.0000         |
| hsa-miR-149-3p   | 0.0000         |
| hsa-miR-1538     | 0.0000         |
| hsa-miR-1914-5p  | 0.0000         |
| hsa-miR-1972     | 0.0000         |
| hsa-miR-21-3p    | 0.0000         |
| hsa-miR-22-5p    | 0.0000         |
| hsa-miR-298      | 0.0000         |
| hsa-miR-34b-5p   | 0.0000         |
| hsa-miR-371a-5p  | 0.0000         |
| hsa-miR-431-5p   | 0.0000         |
| hsa-miR-490-3p   | 0.0000         |
| hsa-miR-514a-3p  | 0.0000         |
| hsa-miR-515-3p   | 0.0000         |
| hsa-miR-524-3p   | 0.0000         |
| hsa-miR-552-3p   | 0.0000         |
| hsa-miR-593-3p   | 0.0000         |
| hsa-miR-593-5p   | 0.0000         |
| hsa-miR-615-5p   | 0.0000         |
| hsa-miR-622      | 0.0000         |
| hsa-miR-659-3p   | 0.0000         |
| hsa-miR-665      | 0.0000         |
| hsa-miR-668-3p   | 0.0000         |
| hsa-miR-671-5p   | 0.0000         |
| hsa-miR-885-5p   | 0.0000         |
| hsa-miR-891b     | 0.0000         |
| hsa-miR-133a-3p  | 0.0124         |
| hsa-miR-202-3p   | 0.0124         |
| hsa-miR-224-5p   | 0.0124         |
| hsa-miR-30c-2-3p | 0.0124         |
| hsa-miR-520h     | 0.0124         |
| hsa-miR-302d-5p  | 0.0139         |
| hsa-miR-433      | 0.0142         |
| hsa-miR-506-3p   | 0.0142         |
| hsa-miR-128-3p   | 0.0150         |
| hsa-miR-1909-3p  | 0.0150         |
| hsa-miR-195-3p   | 0.0150         |
| hsa-miR-329-3p   | 0.0150         |

|                   |        |
|-------------------|--------|
| hsa-miR-34a-5p    | 0.0150 |
| hsa-miR-361-3p    | 0.0150 |
| hsa-miR-579-3p    | 0.0150 |
| hsa-miR-937-3p    | 0.0150 |
| hsa-miRPlus-A1027 | 0.0150 |
| hsa-miR-1200      | 0.0200 |
| hsa-miR-198       | 0.0200 |
| hsa-miR-526b-3p   | 0.0200 |
| hsa-miR-124-3p    | 0.0211 |
| hsa-miR-326       | 0.0211 |
| hsa-miR-432-3p    | 0.0211 |
| hsa-miR-516a-3p   | 0.0211 |
| hsa-miR-611       | 0.0211 |
| hsa-miR-646       | 0.0211 |
| hsa-miRPlus-C1066 | 0.0211 |
| hsa-miR-135b-3p   | 0.0242 |
| hsa-miR-10b-5p    | 0.0278 |
| hsa-miR-1203      | 0.0278 |
| hsa-miR-1254      | 0.0278 |
| hsa-miR-181a-3p   | 0.0278 |
| hsa-miR-564       | 0.0278 |
| hsa-let-7i-3p     | 0.0296 |
| hsa-miR-1236-3p   | 0.0296 |
| hsa-miR-1248      | 0.0296 |
| hsa-miR-1258      | 0.0296 |
| hsa-miR-1260a     | 0.0296 |
| hsa-miR-143-5p    | 0.0296 |
| hsa-miR-147b      | 0.0296 |
| hsa-miR-155-3p    | 0.0296 |
| hsa-miR-214-3p    | 0.0296 |
| hsa-miR-297       | 0.0296 |
| hsa-miR-30c-1-3p  | 0.0296 |
| hsa-miR-365a-3p   | 0.0296 |
| hsa-miR-373-5p    | 0.0296 |
| hsa-miR-410-3p    | 0.0296 |
| hsa-miR-496       | 0.0296 |
| hsa-miR-554       | 0.0296 |
| hsa-miR-623       | 0.0296 |
| hsa-miR-7-2-3p    | 0.0296 |
| hsa-miR-765       | 0.0296 |
| hsa-miR-1237-3p   | 0.0309 |
| hsa-miR-148a-3p   | 0.0309 |
| hsa-miR-331-5p    | 0.0309 |

|                   |        |
|-------------------|--------|
| hsa-miR-583       | 0.0309 |
| hsa-miR-216a-5p   | 0.0323 |
| hsa-miR-376a-5p   | 0.0323 |
| hsa-miR-486-3p    | 0.0323 |
| hsa-miR-504-5p    | 0.0323 |
| hsa-miR-658       | 0.0323 |
| hsa-miR-675-3p    | 0.0323 |
| hsa-miR-302a-3p   | 0.0345 |
| hsa-miR-551b-3p   | 0.0345 |
| hsa-miR-663b      | 0.0345 |
| hsa-miR-758-3p    | 0.0345 |
| hsa-miR-1471      | 0.0360 |
| hsa-miR-323a-5p   | 0.0360 |
| hsa-miR-602       | 0.0360 |
| hsa-miR-382-5p    | 0.0387 |
| hsa-miR-429       | 0.0387 |
| hsa-miR-517-5p    | 0.0395 |
| hsa-miR-216b-5p   | 0.0399 |
| hsa-miR-640       | 0.0410 |
| hsa-miRPlus-C1076 | 0.0410 |
| hsa-miR-1227-3p   | 0.0418 |
| hsa-miR-147a      | 0.0418 |
| hsa-miR-518d-5p   | 0.0418 |
| hsa-miR-596       | 0.0418 |
| hsa-miR-649       | 0.0418 |
| hsa-miR-877-5p    | 0.0418 |
| hsa-miR-518d-3p   | 0.0442 |
| hsa-miR-558       | 0.0442 |
| hsa-miR-182-3p    | 0.0449 |
| hsa-miR-296-3p    | 0.0453 |
| hsa-miR-487a      | 0.0453 |
| hsa-miR-127-5p    | 0.0474 |
| hsa-miR-148b-3p   | 0.0474 |
| hsa-miR-518c-5p   | 0.0474 |
| hsa-miR-642a-5p   | 0.0474 |

**Table S2.** List of 40 differentially expressed microRNAs (Q-value < 0.05) in acute cellular rejection with their experimentally validated targets.

| <b>microRNA</b>   | <b>Target Gene</b> |
|-------------------|--------------------|
| 1. hsa-miR-10b-5p | BCL2L11            |
|                   | CDK2               |
|                   | CDKN1A             |
|                   | CDKN2A             |
|                   | CSNK2A1            |
|                   | HOXD10             |
|                   | KLF4               |
|                   | LAMC1              |
|                   | MAPRE1             |
|                   | NCOR2              |
|                   | NF1                |
|                   | NOTCH1             |
|                   | NR4A3              |
|                   | NRP2               |
|                   | PAX6               |
|                   | PIEZO1             |
|                   | PPARA              |
|                   | SDC1               |
|                   | SRSF1              |
|                   | TFAP2C             |
| TP53              |                    |
| TRA2B             |                    |
| 2. hsa-miR-124-3p | ADIPOR2            |
|                   | AHR                |
|                   | AR                 |
|                   | BACE1              |
|                   | CCL2               |
|                   | CDK2               |
|                   | CDK4               |
|                   | CDK6               |
|                   | CDKN2A             |
|                   | CEBPA              |
|                   | COL1A1             |
|                   | CTDSP1             |
|                   | E2F6               |
|                   | EFNB1              |
|                   | ELK3               |
|                   | EYA4               |
|                   | EZH2               |

FXN  
HCN2  
HMGA1  
IL6  
IL6R  
IQGAP1  
IRAK3  
ITGB1  
KLF4  
LAMC1  
MAP2K3  
MECP2  
MSN  
MTPN  
NFKBIZ  
NR3C1  
NR4A3  
PEA15  
PNP  
PPARA  
PRPS1  
QKI  
RASSF2  
RDH10  
RELA  
ROCK2  
SHC1  
SIRT1  
SLC16A1  
SMYD3  
SNAI2  
SP1  
SULF1  
VIM  
VKORC1

---

|    |              |      |
|----|--------------|------|
| 3. | hsa-miR-1258 | HPSE |
|----|--------------|------|

---

|    |                |                                                        |
|----|----------------|--------------------------------------------------------|
| 4. | hsa-miR-128-3p | BMI1<br>CTDSP1<br>DCX<br>E2F3<br>EGFR<br>EYA4<br>FBXW7 |
|----|----------------|--------------------------------------------------------|

KLF4  
MAP2K1  
NTRK3  
POU5F1  
RELN  
RPS6KA5  
SIRT1  
SLC16A1  
SOX2  
TGFB1

---

5. hsa-miR-133a-3p

BCL2L1  
CACNA1C  
CASP9  
COL1A1  
EGFL7  
EGFR  
FSCN1  
GSTP1  
HCN2  
HCN4  
KCNH2  
KCNQ1  
KRT7  
LASP1  
MCL1  
MSN  
PIK3R2  
PKM  
PNP  
PRDM16  
RGS3  
SP1  
TAGLN2  
VEGFA  
VKORC1

---

6. hsa-miR-147a

ACVR1C  
VEGFA

---

7. hsa-miR-148a-3p

ACVR1  
BCL2  
CCKBR  
CDC25B  
DNMT1  
DNMT3B

|     |                 |         |
|-----|-----------------|---------|
|     |                 | HLA-G   |
|     |                 | IRS1    |
|     |                 | NR1I2   |
|     |                 | RPS6KA5 |
|     |                 | TGIF2   |
|     |                 | TMED7   |
| 8.  | hsa-miR-148b-3p | CCKBR   |
|     |                 | CSF1    |
|     |                 | EYA4    |
|     |                 | HLA-G   |
|     |                 | ITGA5   |
|     |                 | MECP2   |
|     |                 | NR3C2   |
|     |                 | NRAS    |
|     |                 | PIK3CA  |
|     |                 | ROCK1   |
|     |                 | SNAI2   |
| 9.  | hsa-miR-149-3p  | AKT1    |
|     |                 | E2F1    |
|     |                 | MYBL2   |
|     |                 | TGIF2   |
| 10. | hsa-miR-155-3p  | IRAK3   |
| 11. | hsa-miR-181a-3p | NANOG   |
| 12. | hsa-miR-198     | CCNT1   |
|     |                 | MYB     |
|     |                 | NTRK3   |
| 13. | hsa-miR-202-3p  | MYCN    |
| 14. | hsa-miR-214-3p  | ASF1B   |
|     |                 | ATF4    |
|     |                 | BCL2L2  |
|     |                 | CTNNB1  |
|     |                 | MAP2K3  |
|     |                 | MAPK8   |
|     |                 | PLXNB1  |
|     |                 | POU4F2  |
|     |                 | PSMD10  |
|     |                 | PTEN    |
|     |                 | QKI     |
|     |                 | SRGAP1  |
|     |                 | SRGAP2  |
|     |                 | TP53    |
|     |                 | TWIST1  |

|     |                  |                                                                                                      |
|-----|------------------|------------------------------------------------------------------------------------------------------|
|     |                  | XBP1                                                                                                 |
| 15. | hsa-miR-216a-5p  | CD44<br>CDC42<br>PTEN<br>SIRT1<br>SMAD7<br>CSNK2A1                                                   |
| 16. | hsa-miR-216b-5p  | CSNK2A1                                                                                              |
| 17. | hsa-miR-224-5p   | AP2M1<br>API5<br>CDC42<br>CXCR4<br>EDNRA<br>EYA4<br>FOSB<br>KLK10<br>NCOA6<br>NIT1<br>PEBP1<br>SMAD4 |
| 18. | hsa-miR-296-3p   | CDC25B<br>CDKN2A<br>HMGA1<br>KCNH1<br>LGALS3BP<br>PIK3R2<br>PKM<br>SPI1                              |
| 19. | hsa-miR-298      | BACE1<br>CDKN1A                                                                                      |
| 20. | hsa-miR-302a-3p  | AKT1<br>CCND1<br>CDKN1A<br>DAZAP2<br>LEFTY1<br>LEFTY2<br>NR2F2<br>SLAIN1<br>TAC1<br>TOB2             |
| 21. | hsa-miR-30c-1-3p | HMBOX1                                                                                               |
| 22. | hsa-miR-326      | CD9                                                                                                  |



GLI1  
MSH3  
NOTCH1  
NOTCH2  
PKM  
SMO  
VKORC1

---

23. hsa-miR-34a-5p

ACSL1  
ACSL4  
AP2M1  
AXIN2  
AXL  
BCL2  
BMP7  
CCL22  
CCND1  
CCND3  
CCNE2  
CD44  
CDC25A  
CDK4  
CDK6  
CDKN2A  
CDKN2C  
CEBPB  
CTNNB1  
DLL1  
E2F1  
E2F3  
EFNB1  
EPHA5  
FOSL1  
FOXP1  
GRM7  
HDAC1  
HNF4A  
IFNB1  
IMPA1  
IMPDH2  
JAG1  
KLB  
LDHA  
LEF1

MAGEA12  
MAGEA2  
MAGEA3  
MAGEA6  
MAP2K1  
MAP3K9  
MCM5  
MET  
MTA2  
MYB  
MYC  
MYCN  
NANOG  
NOTCH1  
NOTCH2  
PDGFRA  
PEA15  
PPP1R10  
SEPT7  
SIRT1  
SOX2  
SPI1  
STX1A  
SYT1  
TP53  
ULBP2  
VAMP2  
VEGFA  
WNT1  
YY1  
ZAP70

---

24. hsa-miR-34b-5p

BCL2  
CCNE2  
CDK4  
CREB1  
HNF4A  
MET  
MYB  
MYC

---

25. hsa-miR-365a-3p

BCL2  
CCND1  
IL6  
IMPA1

|     |                 |                                                                                                                                                                                                                |
|-----|-----------------|----------------------------------------------------------------------------------------------------------------------------------------------------------------------------------------------------------------|
|     |                 | MTA2                                                                                                                                                                                                           |
| 26. | hsa-miR-376a-5p | ACVR1C<br>PRPS1<br>SLC16A1<br>SNX19<br>SRSF11<br>TTK<br>ZNF513                                                                                                                                                 |
| 27. | hsa-miR-429     | BAP1<br>BCL2<br>ELMO2<br>ERBB2IP<br>HOXB5<br>KLF11<br>KLHL20<br>MYC<br>OSTF1<br>PTPRD<br>RASSF2<br>RERE<br>RIN2<br>SEPT7<br>SHC1<br>SOX2<br>TCF7L1<br>VAC14<br>WASF3<br>WDR37<br>XIAP<br>ZEB1<br>ZEB2<br>ZFPM2 |
| 28. | hsa-miR-490-3p  | ERGIC3                                                                                                                                                                                                         |
| 29. | hsa-miR-504-5p  | DRD1<br>MDM2<br>TCEAL1<br>TP53<br>VEGFA                                                                                                                                                                        |
| 30. | hsa-miR-506-3p  | FXN                                                                                                                                                                                                            |
| 31. | hsa-miR-515-3p  | CDKN1A                                                                                                                                                                                                         |
| 32. | hsa-miR-516a-3p | SULF1                                                                                                                                                                                                          |
| 33. | hsa-miR-520h    | ABCG2                                                                                                                                                                                                          |

VEGFA

|     |                 |          |
|-----|-----------------|----------|
| 34. | hsa-miR-596     | LGALS3BP |
| 35. | hsa-miR-615-5p  | IGF2     |
| 36. | hsa-miR-622     | KRAS     |
| 37. | hsa-miR-642a-5p | DOHH     |
| 38. | hsa-miR-659-3p  | GRN      |
| 39. | hsa-miR-765     | HNF4A    |
|     |                 | NTRK3    |
| 40. | hsa-miR-885-5p  | CDK2     |
|     |                 | MCM5     |

**Table S3.** Comprehensive list of enriched functional categories based 253 experimentally verified gene targets of differentially expressed microRNAs in ACR. Enrichment *P*-values were adjusted for multiple hypothesis testing using Benjamini-Hochberg method (adjusted *P*-value cutoff < 0.01).

| Database      | Functional term                                                                 | Adjusted P-value |
|---------------|---------------------------------------------------------------------------------|------------------|
| GOTERM_BP_ALL | GO:0042127~regulation of cell proliferation                                     | 4.86E-27         |
| GOTERM_BP_ALL | GO:0009893~positive regulation of metabolic process                             | 3.20E-23         |
| GOTERM_BP_ALL | GO:0048856~anatomical structure development                                     | 1.14E-22         |
| GOTERM_BP_ALL | GO:0048513~organ development                                                    | 1.59E-22         |
| GOTERM_BP_ALL | GO:0019222~regulation of metabolic process                                      | 1.95E-22         |
| KEGG_PATHWAY  | hsa05200:Pathways in cancer                                                     | 2.64E-22         |
| GOTERM_BP_ALL | GO:0032502~developmental process                                                | 7.35E-22         |
| GOTERM_BP_ALL | GO:0008284~positive regulation of cell proliferation                            | 1.56E-21         |
| GOTERM_BP_ALL | GO:0048731~system development                                                   | 6.53E-21         |
| KEGG_PATHWAY  | hsa05215:Prostate cancer                                                        | 1.57E-20         |
| GOTERM_BP_ALL | GO:0007275~multicellular organismal development                                 | 2.91E-20         |
| GOTERM_BP_ALL | GO:0048869~cellular developmental process                                       | 4.60E-20         |
| GOTERM_BP_ALL | GO:0030154~cell differentiation                                                 | 5.71E-20         |
| GOTERM_BP_ALL | GO:0045595~regulation of cell differentiation                                   | 1.38E-19         |
| GOTERM_BP_ALL | GO:0006357~regulation of transcription from RNA polymerase II promoter          | 6.77E-19         |
| GOTERM_BP_ALL | GO:0050793~regulation of developmental process                                  | 4.36E-18         |
| GOTERM_BP_ALL | GO:0010628~positive regulation of gene expression                               | 1.19E-17         |
| GOTERM_BP_ALL | GO:0051254~positive regulation of RNA metabolic process                         | 9.30E-17         |
| GOTERM_BP_ALL | GO:0010468~regulation of gene expression                                        | 9.37E-17         |
| GOTERM_MF_ALL | GO:0043565~sequence-specific DNA binding                                        | 1.41E-16         |
| KEGG_PATHWAY  | hsa05220:Chronic myeloid leukemia                                               | 2.45E-16         |
| GOTERM_BP_ALL | GO:0045941~positive regulation of transcription                                 | 7.04E-16         |
| GOTERM_BP_ALL | GO:0009790~embryonic development                                                | 8.93E-16         |
| GOTERM_MF_ALL | GO:0003700~transcription factor activity                                        | 1.22E-15         |
| KEGG_PATHWAY  | hsa05212:Pancreatic cancer                                                      | 1.26E-15         |
| GOTERM_BP_ALL | GO:0022008~neurogenesis                                                         | 5.77E-15         |
| GOTERM_BP_ALL | GO:0051252~regulation of RNA metabolic process                                  | 6.00E-15         |
| KEGG_PATHWAY  | hsa05210:Colorectal cancer                                                      | 3.42E-14         |
| GOTERM_BP_ALL | GO:0045944~positive regulation of transcription from RNA polymerase II promoter | 7.06E-14         |
| GOTERM_BP_ALL | GO:0042221~response to chemical stimulus                                        | 8.53E-14         |
| GOTERM_BP_ALL | GO:0009887~organ morphogenesis                                                  | 1.13E-13         |
| KEGG_PATHWAY  | hsa05214:Glioma                                                                 | 2.71E-13         |
| GOTERM_BP_ALL | GO:0010646~regulation of cell communication                                     | 4.28E-13         |
| GOTERM_BP_ALL | GO:0045449~regulation of transcription                                          | 5.17E-13         |
| GOTERM_BP_ALL | GO:0007399~nervous system development                                           | 7.28E-13         |
| GOTERM_BP_ALL | GO:0048699~generation of neurons                                                | 2.01E-12         |
| KEGG_PATHWAY  | hsa05218:Melanoma                                                               | 2.32E-12         |
| GOTERM_BP_ALL | GO:0051338~regulation of transferase activity                                   | 2.50E-12         |
| KEGG_PATHWAY  | hsa05222:Small cell lung cancer                                                 | 3.87E-12         |
| GOTERM_BP_ALL | GO:0043549~regulation of kinase activity                                        | 4.91E-12         |
| GOTERM_BP_ALL | GO:0000122~negative regulation of transcription from RNA polymerase II promoter | 6.85E-12         |
| GOTERM_BP_ALL | GO:0009725~response to hormone stimulus                                         | 9.62E-12         |
| GOTERM_BP_ALL | GO:0016477~cell migration                                                       | 1.55E-11         |
| KEGG_PATHWAY  | hsa05219:Bladder cancer                                                         | 1.67E-11         |
| GOTERM_BP_ALL | GO:0009888~tissue development                                                   | 1.80E-11         |
| KEGG_PATHWAY  | hsa05213:Endometrial cancer                                                     | 2.50E-11         |
| GOTERM_BP_ALL | GO:0051726~regulation of cell cycle                                             | 2.53E-11         |
| GOTERM_BP_ALL | GO:0042981~regulation of apoptosis                                              | 2.61E-11         |
| GOTERM_BP_ALL | GO:0009966~regulation of signal transduction                                    | 3.30E-11         |
| GOTERM_BP_ALL | GO:0043067~regulation of programmed cell death                                  | 3.55E-11         |
| GOTERM_BP_ALL | GO:0010941~regulation of cell death                                             | 3.98E-11         |
| GOTERM_BP_ALL | GO:0045859~regulation of protein kinase activity                                | 6.48E-11         |
| GOTERM_BP_ALL | GO:0008361~regulation of cell size                                              | 7.65E-11         |
| GOTERM_BP_ALL | GO:0045597~positive regulation of cell differentiation                          | 8.57E-11         |
| GOTERM_BP_ALL | GO:0048870~cell motility                                                        | 1.54E-10         |

|               |                                                                   |          |
|---------------|-------------------------------------------------------------------|----------|
| GOTERM_BP_ALL | GO:0006928~cell motion                                            | 2.25E-10 |
| GOTERM_BP_ALL | GO:0050896~response to stimulus                                   | 2.51E-10 |
| GOTERM_BP_ALL | GO:0045165~cell fate commitment                                   | 2.91E-10 |
| GOTERM_BP_ALL | GO:0050790~regulation of catalytic activity                       | 4.86E-10 |
| KEGG_PATHWAY  | hsa05223:Non-small cell lung cancer                               | 6.38E-10 |
| GOTERM_BP_ALL | GO:0051094~positive regulation of developmental process           | 6.46E-10 |
| GOTERM_BP_ALL | GO:0030334~regulation of cell migration                           | 8.95E-10 |
| GOTERM_BP_ALL | GO:0040012~regulation of locomotion                               | 1.08E-09 |
| GOTERM_CC_ALL | GO:0005654~nucleoplasm                                            | 1.11E-09 |
| GOTERM_BP_ALL | GO:0051270~regulation of cell motion                              | 1.18E-09 |
| GOTERM_BP_ALL | GO:0035295~tube development                                       | 1.79E-09 |
| GOTERM_CC_ALL | GO:0005667~transcription factor complex                           | 2.14E-09 |
| GOTERM_BP_ALL | GO:0010647~positive regulation of cell communication              | 3.52E-09 |
| KEGG_PATHWAY  | hsa04110:Cell cycle                                               | 4.21E-09 |
| GOTERM_MF_ALL | GO:0046983~protein dimerization activity                          | 4.85E-09 |
| GOTERM_BP_ALL | GO:0007417~central nervous system development                     | 7.07E-09 |
| GOTERM_BP_ALL | GO:0040011~locomotion                                             | 9.48E-09 |
| GOTERM_BP_ALL | GO:0030182~neuron differentiation                                 | 1.34E-08 |
| GOTERM_BP_ALL | GO:0009314~response to radiation                                  | 1.43E-08 |
| KEGG_PATHWAY  | hsa04510:Focal adhesion                                           | 1.65E-08 |
| GOTERM_BP_ALL | GO:0001568~blood vessel development                               | 6.83E-08 |
| GOTERM_BP_ALL | GO:0003002~regionalization                                        | 7.22E-08 |
| GOTERM_CC_ALL | GO:0043229~intracellular organelle                                | 9.48E-08 |
| GOTERM_BP_ALL | GO:0001944~vasculature development                                | 1.02E-07 |
| GOTERM_BP_ALL | GO:0006950~response to stress                                     | 1.29E-07 |
| GOTERM_BP_ALL | GO:0022414~reproductive process                                   | 1.44E-07 |
| GOTERM_BP_ALL | GO:0033674~positive regulation of kinase activity                 | 1.46E-07 |
| GOTERM_BP_ALL | GO:0014031~mesenchymal cell development                           | 1.50E-07 |
| GOTERM_BP_ALL | GO:0048762~mesenchymal cell differentiation                       | 1.50E-07 |
| GOTERM_BP_ALL | GO:0060485~mesenchyme development                                 | 1.79E-07 |
| GOTERM_BP_ALL | GO:0009611~response to wounding                                   | 1.96E-07 |
| GOTERM_BP_ALL | GO:0007420~brain development                                      | 2.01E-07 |
| KEGG_PATHWAY  | hsa05221:Acute myeloid leukemia                                   | 2.02E-07 |
| GOTERM_MF_ALL | GO:0004672~protein kinase activity                                | 2.45E-07 |
| GOTERM_MF_ALL | GO:0003677~DNA binding                                            | 2.46E-07 |
| GOTERM_MF_ALL | GO:0016563~transcription activator activity                       | 2.54E-07 |
| GOTERM_MF_ALL | GO:0016301~kinase activity                                        | 2.54E-07 |
| GOTERM_BP_ALL | GO:0000079~regulation of cyclin-dependent protein kinase activity | 2.58E-07 |
| GOTERM_MF_ALL | GO:0008134~transcription factor binding                           | 2.69E-07 |
| GOTERM_BP_ALL | GO:0009967~positive regulation of signal transduction             | 2.82E-07 |
| GOTERM_BP_ALL | GO:0048545~response to steroid hormone stimulus                   | 2.88E-07 |
| GOTERM_BP_ALL | GO:0035239~tube morphogenesis                                     | 3.44E-07 |
| GOTERM_CC_ALL | GO:0042995~cell projection                                        | 4.40E-07 |
| GOTERM_BP_ALL | GO:0008285~negative regulation of cell proliferation              | 4.40E-07 |
| GOTERM_BP_ALL | GO:0002376~immune system process                                  | 5.58E-07 |
| GOTERM_BP_ALL | GO:0048729~tissue morphogenesis                                   | 6.98E-07 |
| GOTERM_MF_ALL | GO:0016773~phosphotransferase activity, alcohol group as acceptor | 6.99E-07 |
| GOTERM_BP_ALL | GO:0048732~gland development                                      | 7.20E-07 |
| GOTERM_BP_ALL | GO:0060284~regulation of cell development                         | 7.20E-07 |
| GOTERM_BP_ALL | GO:0001709~cell fate determination                                | 7.32E-07 |
| KEGG_PATHWAY  | hsa04722:Neurotrophin signaling pathway                           | 9.67E-07 |
| GOTERM_BP_ALL | GO:0051272~positive regulation of cell motion                     | 1.02E-06 |
| GOTERM_BP_ALL | GO:0048514~blood vessel morphogenesis                             | 1.04E-06 |
| GOTERM_BP_ALL | GO:0009952~anterior/posterior pattern formation                   | 1.07E-06 |
| GOTERM_BP_ALL | GO:0048754~branching morphogenesis of a tube                      | 1.40E-06 |
| GOTERM_BP_ALL | GO:0007049~cell cycle                                             | 1.95E-06 |
| GOTERM_BP_ALL | GO:0031960~response to corticosteroid stimulus                    | 1.96E-06 |
| GOTERM_BP_ALL | GO:0002520~immune system development                              | 2.01E-06 |
| GOTERM_BP_ALL | GO:0045860~positive regulation of protein kinase activity         | 2.20E-06 |
| GOTERM_BP_ALL | GO:0048598~embryonic morphogenesis                                | 2.26E-06 |
| GOTERM_BP_ALL | GO:0031099~regeneration                                           | 2.41E-06 |
| GOTERM_BP_ALL | GO:0006915~apoptosis                                              | 2.47E-06 |
| GOTERM_BP_ALL | GO:0008283~cell proliferation                                     | 2.84E-06 |
| GOTERM_BP_ALL | GO:0030335~positive regulation of cell migration                  | 2.99E-06 |

|                  |                                                                                 |          |
|------------------|---------------------------------------------------------------------------------|----------|
| GOTERM_BP_ALL    | GO:0008219~cell death                                                           | 3.18E-06 |
| GOTERM_BP_ALL    | GO:0043434~response to peptide hormone stimulus                                 | 3.20E-06 |
| GOTERM_BP_ALL    | GO:0012501~programmed cell death                                                | 3.29E-06 |
| GOTERM_BP_ALL    | GO:0048534~hemopoietic or lymphoid organ development                            | 3.73E-06 |
| KEGG_PATHWAY     | hsa05216:Thyroid cancer                                                         | 3.92E-06 |
| KEGG_PATHWAY     | hsa04520:Adherens junction                                                      | 4.43E-06 |
| GOTERM_BP_ALL    | GO:0001763~morphogenesis of a branching structure                               | 4.47E-06 |
| KEGG_PATHWAY     | hsa04115:p53 signaling pathway                                                  | 8.52E-06 |
| GOTERM_BP_ALL    | GO:0010648~negative regulation of cell communication                            | 8.94E-06 |
| GOTERM_BP_ALL    | GO:0045937~positive regulation of phosphate metabolic process                   | 9.23E-06 |
| GOTERM_BP_ALL    | GO:0010562~positive regulation of phosphorus metabolic process                  | 9.23E-06 |
| GOTERM_BP_ALL    | GO:0000278~mitotic cell cycle                                                   | 9.63E-06 |
| GOTERM_BP_ALL    | GO:0060541~respiratory system development                                       | 1.88E-05 |
| GOTERM_BP_ALL    | GO:0030097~hemopoiesis                                                          | 2.07E-05 |
| GOTERM_MF_ALL    | GO:0003702~RNA polymerase II transcription factor activity                      | 3.60E-05 |
| GOTERM_BP_ALL    | GO:0048666~neuron development                                                   | 3.61E-05 |
| GOTERM_BP_ALL    | GO:0010551~regulation of specific transcription from RNA polymerase II promoter | 3.61E-05 |
| GOTERM_BP_ALL    | GO:0051960~regulation of nervous system development                             | 3.82E-05 |
| GOTERM_BP_ALL    | GO:0050767~regulation of neurogenesis                                           | 3.91E-05 |
| GOTERM_MF_ALL    | GO:0016564~transcription repressor activity                                     | 5.21E-05 |
| GOTERM_MF_ALL    | GO:0003705~RNA polymerase II transcription factor activity, enhancer binding    | 5.47E-05 |
| GOTERM_BP_ALL    | GO:0031175~neuron projection development                                        | 5.51E-05 |
| GOTERM_BP_ALL    | GO:0048663~neuron fate commitment                                               | 5.52E-05 |
| GOTERM_BP_ALL    | GO:0030324~lung development                                                     | 5.64E-05 |
| GOTERM_BP_ALL    | GO:0060348~bone development                                                     | 6.14E-05 |
| GOTERM_BP_ALL    | GO:0000902~cell morphogenesis                                                   | 6.90E-05 |
| GOTERM_BP_ALL    | GO:0016049~cell growth                                                          | 7.04E-05 |
| GOTERM_BP_ALL    | GO:0030323~respiratory tube development                                         | 7.10E-05 |
| REACTOME_PATHWAY | REACT_11061:Signalling by NGF                                                   | 9.24E-05 |
| KEGG_PATHWAY     | hsa04350:TGF-beta signaling pathway                                             | 9.55E-05 |
| GOTERM_BP_ALL    | GO:0010942~positive regulation of cell death                                    | 1.00E-04 |
| GOTERM_BP_ALL    | GO:0007507~heart development                                                    | 1.25E-04 |
| GOTERM_BP_ALL    | GO:0043193~positive regulation of gene-specific transcription                   | 1.26E-04 |
| GOTERM_BP_ALL    | GO:0006873~cellular ion homeostasis                                             | 1.29E-04 |
| GOTERM_BP_ALL    | GO:0001655~urogenital system development                                        | 1.30E-04 |
| GOTERM_BP_ALL    | GO:0042493~response to drug                                                     | 1.30E-04 |
| GOTERM_BP_ALL    | GO:0042060~wound healing                                                        | 1.54E-04 |
| GOTERM_BP_ALL    | GO:0055082~cellular chemical homeostasis                                        | 1.54E-04 |
| GOTERM_BP_ALL    | GO:0007154~cell communication                                                   | 1.55E-04 |
| GOTERM_BP_ALL    | GO:0010720~positive regulation of cell development                              | 1.59E-04 |
| GOTERM_BP_ALL    | GO:0050678~regulation of epithelial cell proliferation                          | 1.93E-04 |
| GOTERM_BP_ALL    | GO:0070482~response to oxygen levels                                            | 1.93E-04 |
| GOTERM_BP_ALL    | GO:0043405~regulation of MAP kinase activity                                    | 1.93E-04 |
| GOTERM_BP_ALL    | GO:0001775~cell activation                                                      | 1.93E-04 |
| KEGG_PATHWAY     | hsa04310:Wnt signaling pathway                                                  | 2.22E-04 |
| GOTERM_BP_ALL    | GO:0007398~ectoderm development                                                 | 2.29E-04 |
| GOTERM_BP_ALL    | GO:0051301~cell division                                                        | 2.66E-04 |
| GOTERM_BP_ALL    | GO:0042692~muscle cell differentiation                                          | 2.75E-04 |
| GOTERM_BP_ALL    | GO:0045767~regulation of anti-apoptosis                                         | 3.03E-04 |
| GOTERM_BP_ALL    | GO:0010467~gene expression                                                      | 3.45E-04 |
| GOTERM_BP_ALL    | GO:0007243~protein kinase cascade                                               | 3.51E-04 |
| GOTERM_BP_ALL    | GO:0048812~neuron projection morphogenesis                                      | 4.40E-04 |
| GOTERM_BP_ALL    | GO:0008544~epidermis development                                                | 4.53E-04 |
| KEGG_PATHWAY     | hsa04012:ErbB signaling pathway                                                 | 4.65E-04 |
| GOTERM_BP_ALL    | GO:0031100~organ regeneration                                                   | 5.05E-04 |
| GOTERM_BP_ALL    | GO:0001952~regulation of cell-matrix adhesion                                   | 6.01E-04 |
| GOTERM_BP_ALL    | GO:0060429~epithelium development                                               | 8.01E-04 |
| BIOCARTA         | h_cellcyclePathway:Cyclins and Cell Cycle Regulation                            | 8.03E-04 |
| KEGG_PATHWAY     | hsa04010:MAPK signaling pathway                                                 | 1.10E-03 |
| GOTERM_BP_ALL    | GO:0008637~apoptotic mitochondrial changes                                      | 1.14E-03 |
| GOTERM_BP_ALL    | GO:0060393~regulation of pathway-restricted SMAD protein phosphorylation        | 1.19E-03 |
| GOTERM_BP_ALL    | GO:0051057~positive regulation of small GTPase mediated signal transduction     | 1.19E-03 |
| GOTERM_MF_ALL    | GO:0046332~SMAD binding                                                         | 1.22E-03 |
| REACTOME_PATHWAY | REACT_498:Signaling by Insulin receptor                                         | 1.30E-03 |

|               |                                                                          |          |
|---------------|--------------------------------------------------------------------------|----------|
| GOTERM_BP_ALL | GO:0016202~regulation of striated muscle tissue development              | 1.31E-03 |
| GOTERM_BP_ALL | GO:0001525~angiogenesis                                                  | 1.32E-03 |
| GOTERM_BP_ALL | GO:0001822~kidney development                                            | 1.43E-03 |
| GOTERM_BP_ALL | GO:0014033~neural crest cell differentiation                             | 1.50E-03 |
| GOTERM_BP_ALL | GO:0014032~neural crest cell development                                 | 1.50E-03 |
| GOTERM_BP_ALL | GO:0007569~cell aging                                                    | 1.50E-03 |
| GOTERM_BP_ALL | GO:0000904~cell morphogenesis involved in differentiation                | 1.54E-03 |
| GOTERM_BP_ALL | GO:0051240~positive regulation of multicellular organismal process       | 1.54E-03 |
| GOTERM_MF_ALL | GO:0003682~chromatin binding                                             | 1.72E-03 |
| GOTERM_MF_ALL | GO:0016538~cyclin-dependent protein kinase regulator activity            | 1.72E-03 |
| GOTERM_BP_ALL | GO:0045792~negative regulation of cell size                              | 1.73E-03 |
| GOTERM_BP_ALL | GO:0001889~liver development                                             | 1.73E-03 |
| GOTERM_BP_ALL | GO:0010001~glial cell differentiation                                    | 1.73E-03 |
| GOTERM_BP_ALL | GO:0007165~signal transduction                                           | 1.74E-03 |
| GOTERM_BP_ALL | GO:0000165~MAPKKK cascade                                                | 1.76E-03 |
| KEGG_PATHWAY  | hsa04210:Apoptosis                                                       | 2.07E-03 |
| BIOCARTA      | h_p53Pathway:p53 Signaling Pathway                                       | 2.15E-03 |
| GOTERM_BP_ALL | GO:0034330~cell junction organization                                    | 2.47E-03 |
| GOTERM_BP_ALL | GO:0045927~positive regulation of growth                                 | 2.50E-03 |
| BIOCARTA      | h_RacCycDPathway:Influence of Ras and Rho proteins on G1 to S Transition | 2.55E-03 |
| GOTERM_BP_ALL | GO:0001569~patterning of blood vessels                                   | 2.56E-03 |
| GOTERM_BP_ALL | GO:0001666~response to hypoxia                                           | 2.66E-03 |
| KEGG_PATHWAY  | hsa04370:VEGF signaling pathway                                          | 3.12E-03 |
| GOTERM_BP_ALL | GO:0007179~transforming growth factor beta receptor signaling pathway    | 3.14E-03 |
| GOTERM_BP_ALL | GO:0046649~lymphocyte activation                                         | 3.15E-03 |
| GOTERM_BP_ALL | GO:0070663~regulation of leukocyte proliferation                         | 3.20E-03 |
| GOTERM_BP_ALL | GO:0032944~regulation of mononuclear cell proliferation                  | 3.20E-03 |
| GOTERM_BP_ALL | GO:0006952~defense response                                              | 3.37E-03 |
| GOTERM_BP_ALL | GO:0040014~regulation of multicellular organism growth                   | 3.37E-03 |
| GOTERM_BP_ALL | GO:0046651~lymphocyte proliferation                                      | 4.09E-03 |
| GOTERM_BP_ALL | GO:0051591~response to cAMP                                              | 4.09E-03 |
| GOTERM_BP_ALL | GO:0001764~neuron migration                                              | 4.26E-03 |
| GOTERM_BP_ALL | GO:0045321~leukocyte activation                                          | 4.50E-03 |
| GOTERM_BP_ALL | GO:0070661~leukocyte proliferation                                       | 5.00E-03 |
| GOTERM_BP_ALL | GO:0042306~regulation of protein import into nucleus                     | 5.00E-03 |
| GOTERM_BP_ALL | GO:0032943~mononuclear cell proliferation                                | 5.00E-03 |
| KEGG_PATHWAY  | hsa04620:Toll-like receptor signaling pathway                            | 5.10E-03 |
| KEGG_PATHWAY  | hsa04062:Chemokine signaling pathway                                     | 5.12E-03 |
| GOTERM_BP_ALL | GO:0006954~inflammatory response                                         | 6.24E-03 |
| GOTERM_BP_ALL | GO:0002521~leukocyte differentiation                                     | 9.03E-03 |
| GOTERM_BP_ALL | GO:0006325~chromatin organization                                        | 9.05E-03 |
